# Supplementary material
Source: PubMed Central journal article supplement (PMC3227872)

## Suppl. Figure 1

A

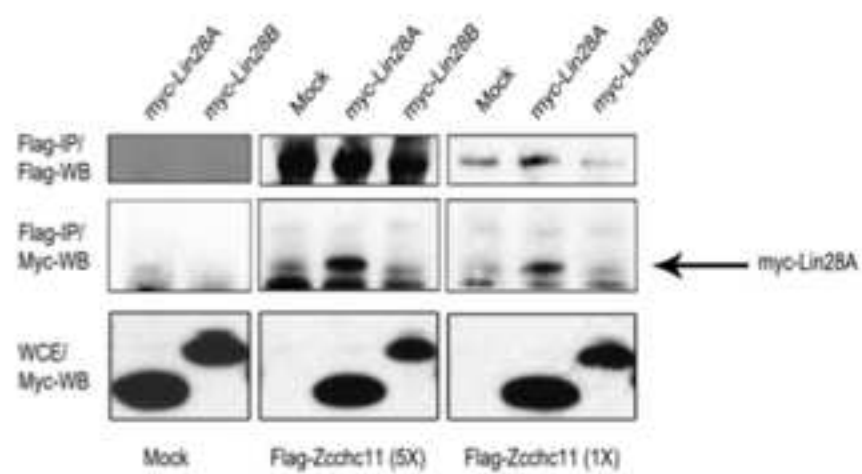

B

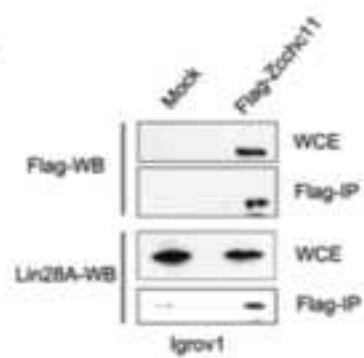

## Suppl. Figure 2

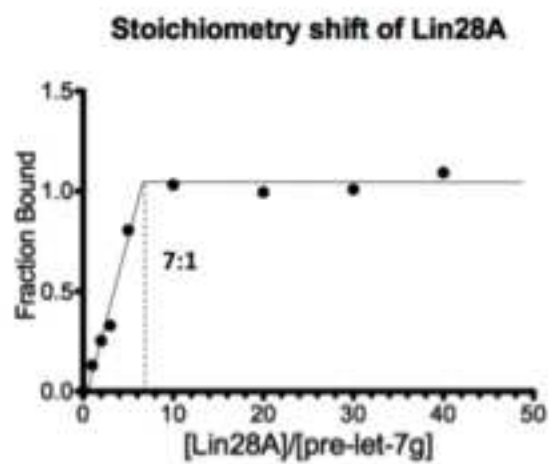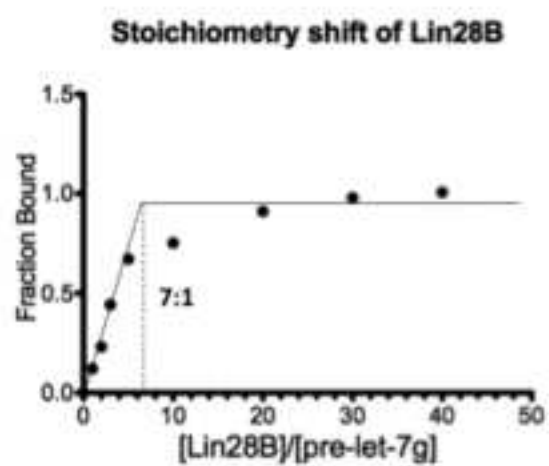

## Suppl. Figure 3

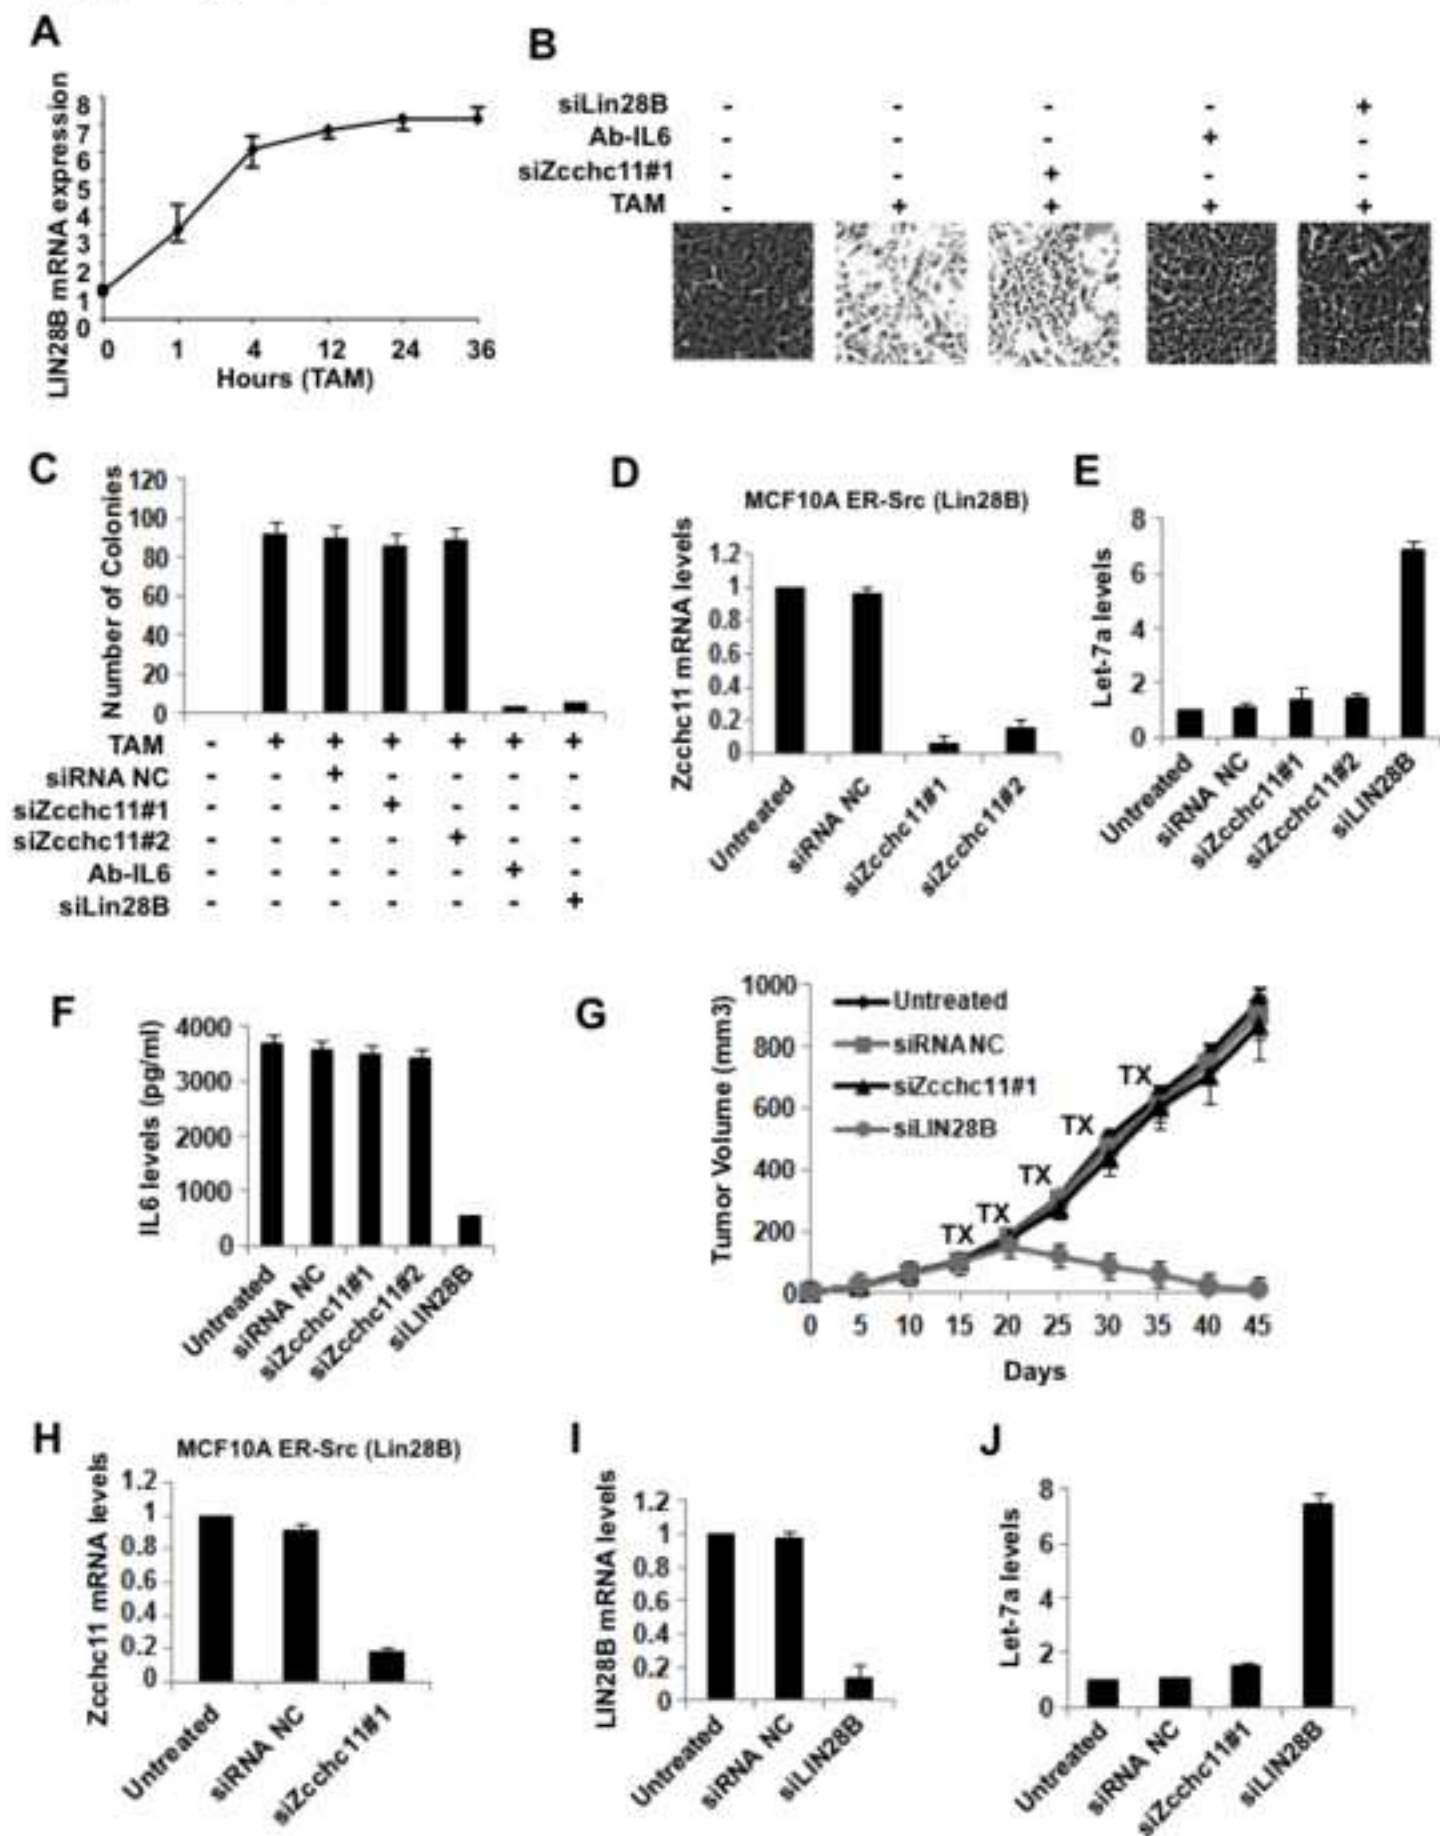

### Suppl. Figure 4

**A**

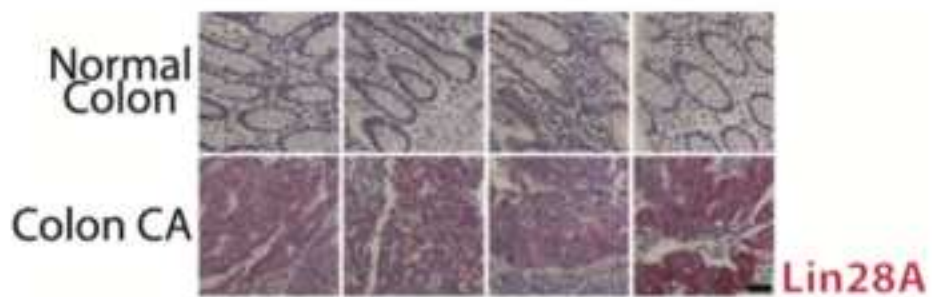

**B**

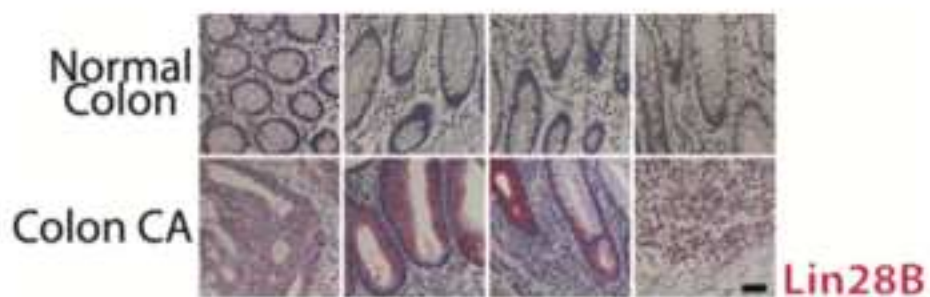

**C**

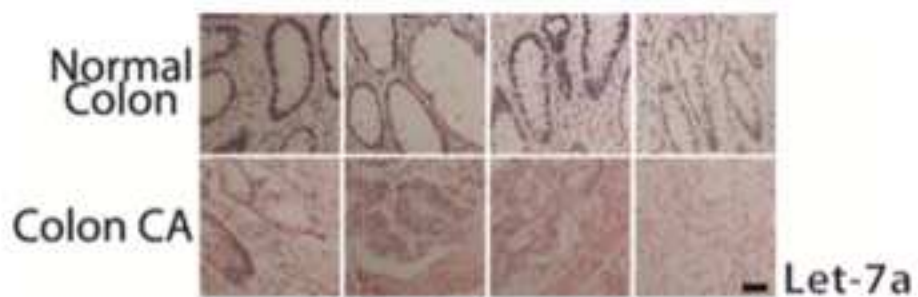

Supplement: NIHMS336756-supplement-02.pdf [file NIHMS336756-supplement-02.pdf]
